# Supplementary material for: Mulberry leaves ameliorate obesity through enhancing brown adipose tissue activity and modulating gut microbiota
Source: Royal Society of Chemistry journal article supplement (doi:10.1039/c9fo00883g), 2019-01-01
Supplement: c9fo00883g1.pdf [file c9fo00883g1.pdf]

**Table S1 Weight ratio and energy ratio of rodent diets.**

|              | LFD             |                    | HFD/ M+HFD      |                    |
|--------------|-----------------|--------------------|-----------------|--------------------|
|              | Weight ratio g% | Energy ratio kcal% | Weight ratio g% | Energy ratio kcal% |
| Protein      | 19.2            | 20                 | 26              | 20                 |
| Carbohydrate | 67.3            | 70                 | 26              | 20                 |
| Fat          | 4.3             | 10                 | 35              | 60                 |
| total:       |                 | 100                |                 | 100                |
| kcal/g       | 3.85            |                    | 5.24            |                    |

**Table S2 Feed formulations of rodent diets.**

| Ingredient               | LFD      |         | □ | HFD      |         | □ | M+HFD    |         |
|--------------------------|----------|---------|---|----------|---------|---|----------|---------|
|                          | g/1000 g | kcal    |   | g/1000 g | kcal    |   | g/1000 g | kcal    |
| Dry mulberry leaf powder | 0        | 0       | □ | 0        | 0       | □ | 200      | 453.36  |
| Casein                   | 189.58   | 758.32  |   | 258.45   | 1033.8  |   | 212.45   | 849.8   |
| Cystine                  | 2.84     | 11.36   |   | 3.88     | 15.52   |   | 2.88     | 11.52   |
| Corn starch              | 298.59   | 1194.36 |   | 0        | 0       |   | 0        | 0       |
| Maltodextrin             | 33.18    | 132.72  |   | 161.53   | 646.12  |   | 121.95   | 487.8   |
| Saccharose               | 331.77   | 1327.08 |   | 88.91    | 355.64  |   | 78.91    | 315.64  |
| Cellulose                | 47.4     | 0       |   | 64.61    | 0       |   | 0        | 0       |
| Soybean oil              | 23.7     | 213.3   |   | 32.31    | 290.79  |   | 32.31    | 290.79  |
| Lard oil                 | 18.96    | 170.64  |   | 316.6    | 2849.4  |   | 311      | 2799    |
| Mineral mixture M1002    | 9.48     | 0       |   | 12.92    | 0       |   | 6.82     | 0       |
| Calcium hydrophosphate   | 12.32    | 0       |   | 16.8     | 0       |   | 7.89     | 0       |
| Calcium carbonate        | 5.21     | 0       |   | 7.11     | 0       |   | 3.75     | 0       |
| Potassium citrate        | 15.64    | 0       |   | 21.32    | 0       |   | 11.41    | 0       |
| Vitamin mixture V1001    | 9.48     | 37.92   |   | 12.92    | 51.68   |   | 8.76     | 35.04   |
| Hydrocholine tartrate    | 1.9      | 0       |   | 2.58     | 0       |   | 1.87     | 0       |
| Edible aizen             | 0        | 0       |   | 0.065    | 0       |   | 0        | 0       |
| Edible yellow dye        | 0.047    | 0       |   | 0        | 0       |   | 0        | 0       |
| Total:                   | 1000     | 3845.7  | □ | 1000     | 5242.95 | □ | 1000     | 5242.95 |

**Table S3 Spearman's rank correlation coefficient between body weight gain and other indexes. (N=18)**

|                            | Correlation coefficient | P     | R <sup>2</sup> |
|----------------------------|-------------------------|-------|----------------|
| BAT/ body weight ratio     | -0.484                  | 0.042 | 0.496          |
| Rectal temperature         | -0.73                   | 0.001 | 0.76           |
| UCP1                       | -0.28                   | 0.26  | 0.328          |
| PGC-1 $\alpha$             | -0.683                  | 0.002 | 0.649          |
| PPAR $\gamma$              | -0.548                  | 0.018 | 0.454          |
| <i>Actinobacteria</i>      | -0.052                  | 0.838 | 0.057          |
| <i>Bacteroidetes</i>       | -0.413                  | 0.089 | 0.441          |
| <i>Cyanobacteria</i>       | 0.741                   | 0.001 | 0.588          |
| <i>Deferribacteres</i>     | 0.152                   | 0.547 | 0.081          |
| <i>Firmicutes</i>          | 0.247                   | 0.323 | 0.327          |
| <i>Proteobacteria</i>      | 0.334                   | 0.175 | 0.34           |
| <i>Saccharibacteria</i>    | -0.178                  | 0.48  | 0.088          |
| <i>Tenericutes</i>         | -0.162                  | 0.52  | 0.159          |
| <i>Verrucomicrobia</i>     | -0.601                  | 0.008 | 0.371          |
| <i>Clostridia</i>          | 0.449                   | 0.062 | 0.421          |
| <i>Lachnospiraceae</i>     | 0.385                   | 0.115 | 0.382          |
| <i>Ruminococcaceae</i>     | 0.541                   | 0.02  | 0.447          |
| <i>S24-7</i>               | -0.375                  | 0.126 | 0.416          |
| <i>Porphyromonadaceae</i>  | -0.536                  | 0.022 | 0.428          |
| <i>Prevotellaceae</i>      | -0.424                  | 0.08  | 0.323          |
| <i>Rikenellaceae</i>       | -0.59                   | 0.01  | 0.486          |
| <i>Alphaproteobacteria</i> | 0.736                   | 0.001 | 0.719          |
| <i>Deltaproteobacteria</i> | 0.565                   | 0.015 | 0.431          |
| <i>Arenimonas</i>          | 0.714                   | 0.001 | 0.707          |
| <i>Bifidobacterium</i>     | -0.344                  | 0.163 | 0.133          |
